# Supplementary material
Source: PubMed Central journal article supplement (PMC4744477)

### **Legend to Supplementary Figure 1.**

A. c.187+241G>A is predicted to create a potential mutant donor splice site at c.187+235. Image from Alamut v2.3 (Available at: <http://www.interactive-biosoftware.com/>). B. RT-PCR of blood from heterozygous mother (c.187+241G>GA), control and homozygous proband (c.187+241G>A). Wild type insulin was found in both the control and mother. An additional product (Abnormal Transcript 1), matching the size of *in silico* predicted mutant mRNA, was weakly detected in the maternal blood sample

Supplementary Figure 1.

A.

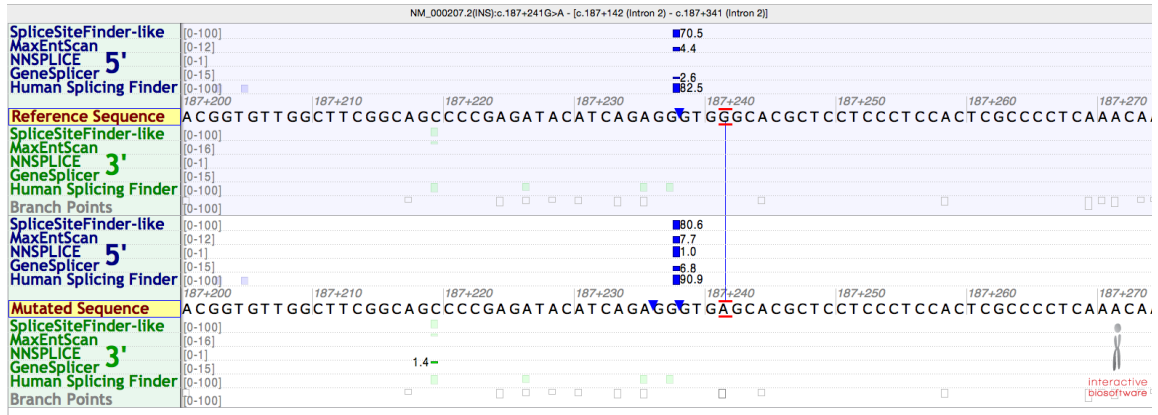

*INS* c.187+241G>A  
new donor +237

B.

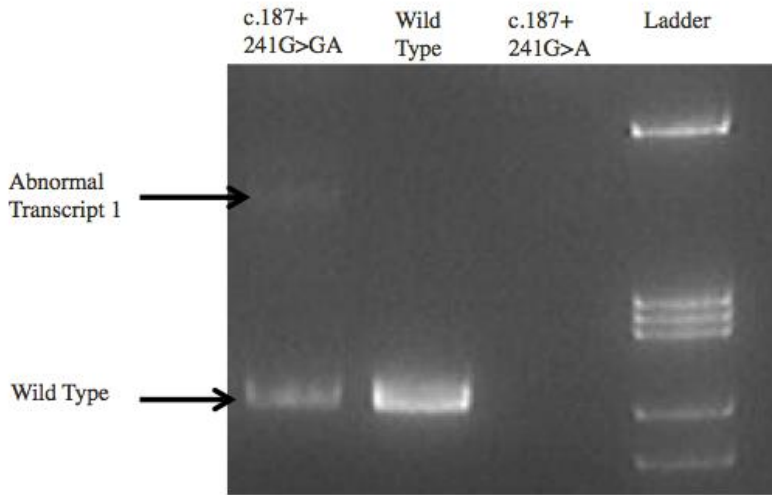

Supplement: NIHMS755698-supplement-supplement_1.pdf [file NIHMS755698-supplement-supplement_1.pdf]
